1 Evolved increases in hemoglobin-oxygen affinity and Bohr effect  
2 coincided with the aquatic specialization of penguins.

3 Anthony V. Signore<sup>a</sup>, Michael S. Tift<sup>b</sup>, Federico G. Hoffmann<sup>c</sup>, Todd L. Schmitt<sup>d</sup>, Hideaki  
4 Moriyama<sup>a</sup>, Jay F. Storz<sup>a\*</sup>

5 <sup>a</sup>School of Biological Sciences, University of Nebraska, Lincoln, NE 68588, USA.

6 <sup>b</sup>Department of Biology and Marine Biology, University of North Carolina, Wilmington, NC 28403,  
7 USA

8 <sup>c</sup>Department of Biochemistry, Molecular Biology, Entomology, and Plant Pathology, Mississippi  
9 State University, MS 39762, USA

10 <sup>d</sup>Veterinary Services, SeaWorld of California, San Diego, CA 92109, USA

11 \*Correspondence to: Jay F. Storz

12 **Email:** jstorz2@unl.edu

13 **Classification**

14 BIOLOGICAL SCIENCES: Evolution

15 **Keywords**

16 Hemoglobin, hypoxia, diving, penguins, Bohr effect, adaptation.

17 **Author Contributions**

18 J.F.S. and A.V.S. designed the research; A.V.S., M.S.T., F.G.H., T.L.S. and H.M. performed the  
19 research; J.F.S., A.V.S., M.S.T., F.G.H., and H.M. analyzed data; J.F.S. and A.V.S. wrote the  
20 manuscript.

21

22 **This PDF file includes:**

23 Main Text

24 Figures 1 to 3

## 25 **Abstract**

26 Dive capacities of air-breathing vertebrates are dictated by onboard O<sub>2</sub> stores, suggesting that  
27 physiological specializations of diving birds like penguins may have involved adaptive changes in  
28 convective O<sub>2</sub> transport. It has been hypothesized that increased hemoglobin (Hb)-O<sub>2</sub> affinity  
29 improves pulmonary O<sub>2</sub> extraction and enhance capacities for breath-hold diving. To investigate  
30 evolved changes in Hb function associated with the aquatic specialization of penguins, we  
31 integrated comparative measurements of whole-blood and purified native Hbs with protein  
32 engineering experiments based on site-directed mutagenesis. We reconstructed and resurrected  
33 ancestral Hbs representing the common ancestor of penguins and the more ancient ancestor  
34 shared by penguins and their closest nondiving relatives (order Procellariiformes, which includes  
35 albatrosses, shearwaters, petrels, and storm petrels). These two ancestors bracket the  
36 phylogenetic interval in which penguin-specific changes in Hb function would have evolved. The  
37 experiments revealed that penguins evolved a derived increase in Hb-O<sub>2</sub> affinity and a greatly  
38 augmented Bohr effect (reduced Hb-O<sub>2</sub> affinity at low pH). Although an increased Hb-O<sub>2</sub> affinity  
39 reduces the gradient for O<sub>2</sub> diffusion from systemic capillaries to metabolizing cells, this can be  
40 compensated by a concomitant enhancement of the Bohr effect, thereby promoting O<sub>2</sub> unloading  
41 in acidified tissues. We suggest that the evolved increase in Hb-O<sub>2</sub> affinity in combination with the  
42 augmented Bohr effect maximizes both O<sub>2</sub> extraction from the lungs and O<sub>2</sub> unloading from the  
43 blood, allowing penguins to fully utilize their onboard O<sub>2</sub> stores and maximize underwater foraging  
44 time.

## 46 **Main Text**

### 47 **Introduction**

48 In air-breathing vertebrates, diving capacities are dictated by onboard O<sub>2</sub> stores and the efficiency  
49 of O<sub>2</sub> use in metabolizing tissues (1). In fully aquatic taxa, selection to prolong breath-hold  
50 submergence and underwater foraging time may have promoted adaptive changes in multiple  
51 components of the O<sub>2</sub>-transport pathway, including oxygenation properties of hemoglobin (Hb).  
52 Vertebrate Hb is a tetrameric protein that is responsible for circulatory O<sub>2</sub> transport, loading O<sub>2</sub> at  
53 pulmonary capillaries and unloading O<sub>2</sub> in the systemic circulation via quaternary structural shifts  
54 between a high affinity (predominately oxygenated) relaxed (R-) state and a low affinity  
55 (predominately deoxygenated) tense (T-) state (2). While this mechanism of respiratory gas  
56 transport is conserved in all vertebrate Hbs, amino acid variation in the constituent  $\alpha$ - and  $\beta$ -type  
57 subunits may alter intrinsic O<sub>2</sub> affinity and the responsiveness to changes in temperature, red cell  
58 pH, and red cell concentrations of allosteric cofactors (non-heme ligands that modulate Hb-O<sub>2</sub>  
59 affinity by preferentially binding and stabilizing the deoxy T conformation) (3, 4).

60 While the quantity of Hb is typically increased in the blood of diving birds and mammals in  
61 comparison with their terrestrial relatives, there is no consensus on whether evolved changes in  
62 Hb-O<sub>2</sub> affinity have contributed to enhanced diving capacities (1). It has been hypothesized that  
63 increased Hb-O<sub>2</sub> affinity may improve pulmonary O<sub>2</sub> extraction in diving mammals, thereby  
64 enhancing diving capacity (5), but more comparative data are needed to assess evidence for an  
65 adaptive trend (6, 7). Experimental measurements on whole-blood suggest that the emperor  
66 penguin (*Aptenodytes forsteri*) may have a higher blood-O<sub>2</sub> affinity relative to nondiving  
67 waterbirds, a finding that has fostered the view that this is a property that characterizes penguins  
68 as a group (8–10). However, blood-O<sub>2</sub> affinity is a highly plastic trait that is influenced by changes  
69 in red cell metabolism and acid-base balance, so measurements on purified Hb are needed to  
70 assess whether observed species differences in blood-O<sub>2</sub> affinity stem from genetically based  
71 changes in the oxygenation properties of Hb. Moreover, even if species differences in Hb-O<sub>2</sub>  
72 affinity are genetically based, comparative data from extant taxa do not reveal whether observed  
73 differences are attributable to a derived increase in penguins, a derived reduction in their  
74 nondiving relatives, or a combination of changes in both directions.

75 To investigate evolved changes in Hb function associated with the aquatic specialization  
76 of penguins, we integrated experimental measurements of whole-blood and purified native Hbs  
77

79 with evolutionary analyses of globin sequence variation. To characterize the mechanistic basis of  
80 evolved changes in Hb function in the stem lineage of penguins, we performed protein  
81 engineering experiments on reconstructed and resurrected ancestral Hbs representing (i) the  
82 common ancestor of penguins and (ii) the more ancient ancestor shared by penguins and their  
83 closest nondiving relatives (order Procellariiformes, which includes albatrosses, shearwaters,  
84 petrels, and storm petrels) (Figure 1). These two ancestors bracket the phylogenetic interval in  
85 which penguin-specific changes in Hb function would have evolved.

## 88 Results and Discussion

89  
90 **Oxygen binding properties of penguin whole-blood and purified Hbs.** Using blood samples  
91 from multiple individuals of six penguin species, we measured the partial pressure of O<sub>2</sub> ( $P_{O_2}$ ) at  
92 50% saturation ( $P_{50}$ ) for whole-blood and purified Hbs in the absence (stripped) and presence of  
93 allosteric cofactors (+KCl +IHP [inositol hexaphosphate]) (Figure 2). Whole-blood  $P_{50}$  values were  
94 similar across all penguins, averaging  $33.3 \pm 1.1$  torr (Figure 2; Table S1), consistent with previously  
95 published data for emperor, Adélie, chinstrap, and gentoo penguins (8, 9, 11). Similarly, measured  
96 O<sub>2</sub>-affinities for purified Hbs exhibited very little variation among species, both in the presence and  
97 absence of allosteric cofactors (Figure 2; Table S1). Penguins express a single Hb isoform during  
98 postnatal life (HbA), in contrast to the majority of other bird species that express one major and one  
99 minor isoform (HbA and HbD, respectively) (12, 13). The lack of variation in Hb-O<sub>2</sub> affinity among  
100 penguins is consistent with the low level of amino acid variation in the  $\alpha$ - and  $\beta$ -chains (Figure S1).  
101 The experiments revealed that penguin Hbs exhibit a remarkably large shift in the magnitude of the  
102 Bohr effect (i.e. the reduction in Hb-O<sub>2</sub> affinity in response to reduced pH) with the addition of  
103 allosteric cofactors (Table S1). The average Bohr effect of penguin Hb more than doubles with the  
104 addition of allosteric cofactors, from  $-0.21 \pm 0.03$  to  $-0.53 \pm 0.04$  (Table S1).

105 Our experimental results indicate that penguins have a generally higher Hb-O<sub>2</sub> affinity than  
106 other birds (12, 14–22), consistent with previous suggestions based on measurements on whole-  
107 blood (8, 9, 23–25). Whole-blood O<sub>2</sub>-affinities of the six examined penguin species (30.4 to 38.1  
108 torr at 37°C, pH 7.40) were uniformly higher than that from a representative member of  
109 Procellariiformes, the southern giant petrel (*Macronectes giganteus*; 42.5 torr at 38°C, pH 7.40) (9).  
110 Similarly, numerous high-altitude bird species have convergently evolved increased Hb-O<sub>2</sub>  
111 affinities (17, 18, 20, 21), which appears to be adaptive because it helps safeguard arterial O<sub>2</sub>  
112 saturation in spite of the reduced  $P_{O_2}$  of inspired air (26–28). The difference in blood  $P_{50}$ 's between  
113 penguins and the southern giant petrel is generally much greater in magnitude than differences in  
114 Hb  $P_{50}$  between closely related species of low- and high-altitude birds (17, 18, 20, 21). Similar to  
115 the case of other diving vertebrates (29), the Bohr effect of penguin Hb also greatly exceeds typical  
116 avian values.

117  
118 **Ancestral protein resurrection.** In principle, the observed difference in Hb-O<sub>2</sub> affinity between  
119 penguins and their closest non-diving relatives could be explained by a derived increase in Hb-O<sub>2</sub>  
120 affinity in the penguin lineage (the generally assumed adaptive scenario), a derived reduction in  
121 the stem lineage of Procellariiformes (the nondiving sister group), or a combination of changes in  
122 both directions. To test these alternative hypotheses, we reconstructed the Hbs of the common  
123 ancestor of penguins (AncSphen) and the more ancient common ancestor of Procellariimorphae  
124 (the superorder comprising Sphenisciformes [penguins] and Procellariiformes; AncPro) (Figures  
125 1, S2, S3 and S4). We then recombinantly expressed and purified the ancestral Hbs to perform *in*  
126 *vitro* functional tests. Measurements of O<sub>2</sub>-equilibrium curves revealed that the AncSphen Hb has  
127 a significantly higher O<sub>2</sub>-affinity than that of AncPro (Figure 3), indicating that penguins evolved a  
128 derived increase in Hb-O<sub>2</sub> affinity. In the presence of allosteric cofactors, the  $P_{50}$  of AncSphen is  
129 much lower (O<sub>2</sub>-affinity is higher) compared to AncPro (11.8 vs. 20.2 torr). Much like the evolved  
130 increases in Hb-O<sub>2</sub> affinity in high-altitude birds (18, 20–22), the increased O<sub>2</sub>-affinity of penguin  
131 Hb is attributable to an increase in intrinsic affinity rather than a reduced responsiveness to

132 allosteric cofactors, as the Hb–O<sub>2</sub> affinity difference between AncSphen and AncPro persists in  
133 the presence and absence of Cl<sup>-</sup> and IHP (Figure 3).

134 In addition to the derived increase in Hb–O<sub>2</sub> affinity, comparisons between AncSphen and  
135 AncPro also revealed that the Hb of penguins evolved an enhanced responsiveness to pH (Bohr  
136 effect). Under stripped conditions, the Bohr effect of AncSphen and AncPro ( $-0.30 \pm 0.09$  and  $-$   
137  $0.27 \pm 0.1$ , respectively) were highly similar to one another and were similar to values measured for  
138 native penguin Hbs under the same conditions (Figure 3E; Table S1). However, in the presence of  
139 allosteric cofactors the Bohr effect of AncSphen increases more than two-fold (similar to that of  
140 native penguin Hbs), whereas that of AncPro shows little change (Figure 3E), demonstrating that  
141 penguins evolved an increased cofactor-linked Bohr effect following divergence from their non-  
142 diving relatives. An increased Hb–O<sub>2</sub> affinity is expected to reduce the gradient for O<sub>2</sub> diffusion from  
143 systemic capillaries to the cells of metabolizing tissues, and an increased Bohr effect can  
144 compensate for this by reducing Hb–O<sub>2</sub> affinity at low pH, thereby promoting O<sub>2</sub> unloading in  
145 acidified tissues. A similar augmentation of the Bohr effect was recently documented in the Hb of  
146 high-altitude Tibetan canids (30). In summary, the Hbs of penguins evolved an increase in O<sub>2</sub>-  
147 affinity and enhanced Bohr effect in association with other physiological and morphological  
148 specializations for a more fully aquatic existence.

149  
150 **Tests of positive selection.** Given that joint increases in the O<sub>2</sub>-affinity and Bohr effect of penguin  
151 Hb represent derived character states, we performed a molecular evolution analysis to test for  
152 evidence of positive selection in the  $\alpha$ - and  $\beta$ -globin genes. Specifically, we tested for an  
153 accelerated rate of amino acid substitution in the stem lineage of penguins (the branch connecting  
154 Anc Procellariimorphae [AncPro] to the common ancestor of penguins [AncSphen]) using the  
155 branch-sites test. This test revealed no evidence for an accelerated rate of amino acid substitution  
156 in the stem lineage of penguins (Table S2), and a clade test revealed no significant variation in  
157 substitution rate among different penguin lineages (Table S3). Thus, if the increased Hb–O<sub>2</sub> affinity  
158 of penguins represents an adaptation that evolved via positive selection, the nature of the causative  
159 changes did not produce a detectable statistical signature in the  $\alpha$ - and  $\beta$ -type globin genes.

160  
161 **Molecular modelling.** We used molecular modelling to identify which specific amino acid  
162 substitutions may be responsible for the increased Hb–O<sub>2</sub> affinity of AncSphen relative to AncPro.  
163 Of the 17 amino acid substitutions that distinguish AncSphen and AncPro, our analyses identified  
164 four substitutions that could potentially alter O<sub>2</sub>-binding properties. The substitution Thr $\beta$ 119Ser in  
165 the branch leading to AncSphen affects the stabilization of R-state (oxygenated) Hb. Specifically,  
166 the hydroxyl group of  $\beta$ 119Ser in helix G is oriented toward the subunit interface by forming a  
167 hydrogen-bond with  $\beta$ 120Lys, which permits an intersubunit contact with  $\alpha$ 111Ile (Figure 3A,B).  
168 This bond between  $\beta$ 119Ser and  $\alpha$ 111Ile stabilizes the R-state conformation by clamping the  
169 intersubunit motions, which is predicted to increase Hb–O<sub>2</sub> affinity by raising the free energy of the  
170 oxygenation-linked allosteric R→T transition in quaternary structure. Additionally, our model  
171 identified three other amino acid substitutions,  $\alpha$ A138S,  $\beta$ A51S and  $\beta$ I55L, that create intersubunit  
172 contacts and further stabilize the R-state conformation.

173  
174 **Testing causative substitutions.** To test model-based predictions about the specific substitutions  
175 that are responsible for the increased O<sub>2</sub>-affinity of penguin Hb, we used site-directed mutagenesis  
176 to introduce combinations of mutations at four candidate sites on the AncPro background. We first  
177 tested the effect of a single mutation whereby  $\beta$ 119Thr was replaced with Ser (AncPro $\beta$ T119S).  
178 We then tested the net effect of mutations at all 4 sites on the AncPro background (AncPro+4;  
179  $\alpha$ A138S,  $\beta$ A51S,  $\beta$ I55L, and  $\beta$ T119S). The protein engineering experiments revealed that  $\beta$ T119S  
180 produced a negligible individual effect on Hb–O<sub>2</sub> affinity when introduced on the AncPro  
181 background, but it produced an appreciable increase in the Bohr effect (Figure 3D, E). The 4  
182 mutations in combination produced a modest increase in Hb–O<sub>2</sub> affinity and a more pronounced  
183 increase in the Bohr effect, but they did not fully recapitulate observed differences between AncPro  
184 and AncSphen in either of these properties (Figure 3). These data suggest the evolved functional

185 changes in penguin Hb must be attributable to the net effect of multiple amino acid substitutions at  
186 structurally disparate sites.

187

188 **Adaptive significance of increased Hb-O<sub>2</sub> affinity.** The key to extending dive times for aquatic  
189 vertebrates is to increase O<sub>2</sub> carrying capacity while keeping metabolic O<sub>2</sub> demands as low as  
190 possible during breath-hold submergence. Submergence induces intense bradycardia and  
191 peripheral vasoconstriction, which conserves finite O<sub>2</sub> stores for tissues that are intolerant to  
192 hypoxia (i.e. the central nervous system and heart) (31). O<sub>2</sub> stores are typically increased in diving  
193 vertebrates via increased blood volume, increased blood Hb concentration, increased myoglobin  
194 concentration in skeletal muscle, increased muscle mass and, occasionally, increased diving lung  
195 volume (1). As deep diving cetaceans and pinnipeds exhale before submergence, their lungs  
196 account for less than 10% of total O<sub>2</sub> stores (1, 32). This reduction in diving lung volume reduces  
197 gaseous N<sub>2</sub> and O<sub>2</sub>, which presumably limits decompression sickness. Conversely, as penguins  
198 inhale at the onset of a dive, their diving lung volume accounts for a much larger percentage of  
199 total O<sub>2</sub> stores (19% and 45% for the emperor and Adélie penguins, respectively) (1, 33). Indeed,  
200 in diving emperor penguins, O<sub>2</sub> extraction from pulmonary stores is continuous during  
201 submergence (34, 35). An elevated Hb-O<sub>2</sub> affinity (such as that found in penguins) can maximize  
202 O<sub>2</sub> extraction from pulmonary stores, as greater blood-O<sub>2</sub> saturation can be achieved at any given  
203 parabronchial P<sub>O<sub>2</sub></sub>. However, while increased Hb-O<sub>2</sub> affinity may confer more complete transfer of  
204 O<sub>2</sub> from the lungs to the blood, it can inhibit subsequent O<sub>2</sub> transfer from the blood to the tissues.  
205 Despite this, emperor penguins almost completely deplete their circulatory stores during extended  
206 dives, as their end-of-dive venous P<sub>O<sub>2</sub></sub> can be as low as 1-6 torr (34). The enhanced Bohr effect of  
207 penguin Hb should improve O<sub>2</sub> delivery to working (acidic) tissues, allowing more complete O<sub>2</sub>  
208 unloading of the blood. We suggest this modification works in tandem with increased Hb-O<sub>2</sub> affinity  
209 to maximize both O<sub>2</sub> extraction from the lungs and O<sub>2</sub> unloading from the blood, allowing penguins  
210 to fully utilize their onboard O<sub>2</sub> stores and maximize underwater foraging time.

211

212

## 213 **Materials and Methods**

214

215 **Blood collection.** We collected blood from 18 individual penguins representing six species:  
216 *Aptenodytes forsteri*, *A. patagonicus*, *Pygoscelis adeliae*, *P. papua*, *P. antarcticus*, and  
217 *Spheniscus magellanicus* ( $n=3$  individuals per species). All birds were sampled during routine  
218 health checks at SeaWorld of California (San Diego, California). Blood was collected by  
219 venipuncture of the jugular vein using Vacutainer® Safety-Lok™ blood collection set (Becton  
220 Dickinson, Franklin Lakes, NJ) with 21 G x 3/4" (0.8 x 19 mm) needle attached to a heparin blood  
221 collection tube (Becton Dickinson). A subsample of whole-blood (200 µl) was set aside for oxygen  
222 equilibrium curves (see below) and the remaining blood was centrifuged at 5000xg for 15  
223 minutes. Plasma, buffy coat, and hematocrit fractions from the centrifuged samples were  
224 immediately placed in separate tubes and flash frozen at -80°C for future analyses.

225

226 **Sequencing of penguin globin genes.** RNA was extracted from ~100 µl of flash frozen  
227 erythrocytes using an RNeasy Universal Plus Mini Kit (Qiagen). cDNA was synthesized from  
228 freshly prepared RNA using Superscript IV Reverse transcriptase (Invitrogen). Gene specific  
229 primers used to amplify the α- and β-type globin transcripts were designed from the 5' and 3'  
230 flanking regions of all publicly available penguin globin genes. PCR reactions were conducted  
231 using 1 ml of cDNA template in 0.2 ml tubes containing 25 µl of reaction mixture (0.5 µl of each  
232 dNTP (2.5 mM), 2.5 µl of 10x Reaction Buffer (Invitrogen), 0.75 µl of 50 mM MgCl<sub>2</sub>, 1.25 µl of  
233 each primer (10 pmol/µl), 1 µl of Taq polymerase (Invitrogen) and 16.75 µl of ddH<sub>2</sub>O), using an  
234 Eppendorf Mastercycler® Gradient thermocycler. Following a 5-min denaturation period at 94°C,  
235 the desired products were amplified using a cycling profile of 94°C for 30 sec; 53-65°C for 30 sec;  
236 72°C for 45 sec for 30 cycles followed by a final extension period of 5 min at 72°C. Amplified  
237 products were run on a 1.5% agarose gel and bands of the correct size were subsequently  
238 excised and purified using Zymoclean Gel DNA recovery columns (Zymo Research). Gel-purified

239 PCR products were ligated into pCR™4-TOPO® vectors using a TOPO™ TA Cloning™ Kit and  
240 were then transformed into One Shot™ TOP10 Chemically Competent E. coli (Thermo Fisher  
241 Scientific). Three to six transformed colonies were cultured in 5 ml of LB medium and plasmids  
242 were subsequently purified with a GeneJET Plasmid Miniprep kit (Thermo Fisher Scientific).  
243 Purified plasmids were sequenced by Eurofins Genomics.  
244

245 **Sequence analyses.** Genomic sequences containing the complete  $\alpha$ - and  $\beta$ -globin gene clusters  
246 for the emperor penguin (*A. forsteri*), Adélie penguin (*P. adeliae*), northern fulmar (*Fulmarus*  
247 *glacialis*), band-rumped storm-petrel (*Hydrobates castro*), southern giant petrel (*Macronectes*  
248 *giganteus*), flightless cormorant (*Nannopterum harrisi*), crested ibis (*Nipponia nippon*), and the  
249 little egret (*Egretta garzetta*) were obtained from GenBank. The  $\alpha$ - and  $\beta$ -globin gene clusters  
250 from the remaining 19 extant penguin species were obtained from GigaDB (36). Coding  
251 sequences of  $\alpha$ - and  $\beta$ -globin genes extracted from these genomic sequences were combined  
252 with the newly generated cDNA sequences mentioned above (Figure S2). Sequences were  
253 aligned using MUSCLE (37) and were then used to estimate phylogenetic trees. The best fitting  
254 codon substitution model and initial tree search were estimated using IQ-TREE with the options -  
255 st CODON, -m TESTNEW, -allnri, and -bnni (38, 39). Initial trees were then subjected to 1000  
256 ultrafast bootstrap replicates (40). Bootstrap consensus trees (Figure S3) were used to estimate  
257 ancestral globin sequences using IQ-TREE with the option -asr (Figures S2 and S4).  
258

259 **Selection analyses.** We tested for selection in the evolution of the penguins'  $\alpha$ - and  $\beta$ -globin  
260 genes in a maximum likelihood framework with the codon-based models implemented in the  
261 codeml program from the PAML v4.9 suite (41), using the phylogenetic trees described above  
262 (see "Sequence analyses"). We used the branch-site and clade models to examine variation in  $\omega$ ,  
263 the ratio of the rate of nonsynonymous substitutions per nonsynonymous site, dN, to the rate of  
264 synonymous substitutions per synonymous site, dS. We used branch-site model A (42, 43) to test  
265 for positive selection in the branch connecting AncPro to AncSphe (the stem lineage of  
266 penguins) (Table S2), and we used clade C model (44) to test for selection in the penguin clade  
267 using M2a\_rel from Weadick and Chang (45) as the null model (Table S3).  
268

269 **Molecular modelling.** Structural modeling was performed on the SWISS MODEL server  
270 (46) using graylag goose hemoglobin in oxy form (PDB 1faw). AncPro and AncSphe Hbs had  
271 QMEAN values of -0.61 and -0.65, respectively. The root mean square distance of the main  
272 chain between template and model (RMSD) values < 0.09Å were considered usable (47).  
273 Structural mining and preparation of graphics were performed using the PyMOL Molecular  
274 Graphics System, version 2.3.2 (Schrödinger, LLC, New York, NY, USA). Hydrogen bond listing  
275 was performed using a PyMol script list\_hb.py (Robert L. Campbell, Biomedical and Molecular  
276 Sciences, Queen's University, Canada). The interface binding energy was calculated by the  
277 ePISA server (48).  
278

279 **Construction of Hb expression vectors.** Reconstructed ancestral globins were synthesized by  
280 GeneArt Gene Synthesis (Thermo Fisher Scientific) after optimizing the nucleotide sequences in  
281 accordance with *E. coli* codon preferences. The synthesized globin gene cassette was cloned  
282 into a custom pGM vector system along with the methionine aminopeptidase (MAP) gene, as  
283 described previously (49). We engineered the Thr $\beta$ 119Ser substitution by whole plasmid  
284 amplification using mutagenic primers and Phusion High-Fidelity DNA Polymerase (New England  
285 BioLabs), phosphorylation with T4 Polynucleotide Kinase (New England BioLabs), and  
286 circularization with an NEB Quick Ligation Kit (New England BioLabs). All site-directed  
287 mutagenesis steps were performed using the manufacturer's recommended protocol. Each  
288 plasmid was verified with DNA sequencing by Eurofins genomics.  
289

290 **Expression and purification of recombinant Hbs.** Recombinant Hb expression was carried out  
291 in the *E. coli* JM109 (DE3) strain as described previously (15, 49, 50). Bacterial cell lysates were  
292 loaded onto a HiTrap SP HP anion exchange column (GE Healthcare) and were then equilibrated

293 with 50 mM HEPES/0.5 mM EDTA (pH 7.0) and eluted with a linear gradient of 0 - 0.25 M NaCl.  
294 Hb-containing fractions were then loaded on to a HiTrap Q HP cation exchange column (GE  
295 Healthcare) equilibrated with 20 mM Tris-HCl/0.5mM EDTA (pH 8.6) and eluted with a linear pH  
296 gradient 0 - 0.25 M NaCl. Eluted Hb fractions were concentrated using Amicon Ultra-4 Centrifugal  
297 Filter Units (Millipore).

298  
299 **Sample preparation for O<sub>2</sub>-equilibrium curves.** Fresh whole-blood was diluted 1:15 with each  
300 individual's own plasma and oxygen-equilibrium curves were measured immediately after  
301 sampling. To obtain stripped hemolysate, 100 $\mu$ l centrifuged red blood cells were added to a 5x  
302 volume of 0.01 M HEPES/0.5 mM EDTA buffer (pH 7.4) and incubated on ice for 30 min to lyse  
303 the red blood cells. NaCl was added to a final concentration of 0.2 M and samples were  
304 centrifuged at 20,000 x g for 10 min to remove cell debris. Hemolysate supernatants and purified  
305 recombinant hemoglobins were similarly desalted by passing through a PD-10 desalting column  
306 (GE Healthcare) equilibrated with 25 ml of 0.01 M HEPES/0.5mM EDTA (pH 7.4). Eluates were  
307 concentrated using Amicon Ultra-4 Centrifugal Filter Units (Millipore). From these concentrated  
308 samples, Hb solutions (0.1 mM hemoglobin in 0.1 M HEPES/0.05 M EDTA buffer) were prepared  
309 in the absence (stripped) and the presence of 0.1 M KCl and 0.2 mM inositol hexaphosphate  
310 (+KCl +IHP). Stripped and +KCl +IHP treatments were prepared at three different pHs (for a total  
311 of 6 treatments per Hb sample), where working solutions was adjusted with NaOH to as near 7.2,  
312 7.4, or 7.6 as possible, then pH was precisely measured with an Orion Star A211 pH Meter and  
313 Orion™ PerpHecT™ ROSS™ Combination pH Micro Electrode.

314  
315 **Measuring O<sub>2</sub>-binding properties.** O<sub>2</sub>-equilibrium curves were measured using a Blood Oxygen  
316 Binding System (Loligo Systems) at 37°C. The pH of whole-blood samples was set by measuring  
317 curves in the presence of 45 torr CO<sub>2</sub>, whereas the pH of Hb solutions was set with HEPES buffer  
318 (see above). Each whole-blood sample and Hb solution were sequentially equilibrated with an  
319 array of oxygen tensions ( $P_{O_2}$ ) while the sample absorbance was continually monitored at 430 nm  
320 (deoxy peak) and 421 nm (oxy/deoxy isobestic point). Each equilibration step was considered  
321 complete when the absorbance at 430 nm had stabilized (2 - 4 minutes). Only oxygen tensions  
322 yielding 30 - 70% Hb-O<sub>2</sub> saturation were used in subsequent analyses. Hill plots ( $\log[\text{fractional}$   
323  $\text{saturation}/[1-\text{fractional saturation}]]$  vs.  $\log P_{O_2}$ ) were constructed from these measurements. A  
324 linear regression was fit to these plots and was used to determine the  $P_{O_2}$  at half-saturation ( $P_{50}$ )  
325 and the cooperativity coefficient ( $n_{50}$ ), where the X-intercept and slope of the regression line  
326 represent the  $P_{50}$  and  $n_{50}$ , respectively. Whole-blood samples (n=3) are presented as mean $\pm$ SE.  
327 For Hb solutions, a linear regression was fit to plots of  $\log P_{50}$  vs. pH, and the resulting equation  
328 was used to estimate  $P_{50}$  values at pH 7.40 ( $\pm$  SE of the regression estimate).

### 329 330 **Acknowledgments**

331  
332 We would like to extend our sincere gratitude to the trainers and veterinary staff at SeaWorld of  
333 California for their help in this project, Jennifer Rego for blood sample collection and Dr. Judy St.  
334 Leger for logistical support. We thank S. Mohammadi, N. Gutierrez-Pinto, J. Hite, M. Kobiela, A.  
335 Dhawanjewar, M. Kulbaba, M. Gaudry and A. Quijada-Rodriguez for helpful comments on this  
336 manuscript. This research was supported by funding from the National Institutes of Health  
337 (HL087216 [JFS] and F32HL136202 [MST]), the National Science Foundation (OIA-1736249  
338 [JFS], IOS-1927675 [JFS] and 1927616 [MST]) and the SeaWorld Parks & Entertainment  
339 technical contribution (2020-19).

340  
341  
342  
343

### 342 **References**

- 344 1. G. L. Kooyman, P. J. Ponganis, The physiological basis of diving to depth: Birds and  
345 mammals. *An. Rev. Physiol.* **60**, 19–32 (1998).

- 346 2. M. F. Perutz, Stereochemistry of cooperative effects in haemoglobin. *Nature* **228**, 726–739  
347 (1970).
- 348 3. M. F. Perutz, Species adaptation in a protein molecule. *Mol. Biol. Evol.* **1**, 1–28 (1983).
- 349 4. J. F. Storz, *Hemoglobin: Insights Into Protein Structure, Function, and Evolution* (Oxford  
350 University Press, USA, 2019).
- 351 5. G. K. Snyder, Respiratory adaptations in diving mammals. *Respir. Physiol.* **54**, 269–294  
352 (1983).
- 353 6. A. V. Signore, *et al.*, Emergence of a chimeric globin pseudogene and increased hemoglobin  
354 oxygen affinity underlie the evolution of aquatic specializations in sirenia. *Mol. Bio. Evol.* **36**,  
355 1134–1147 (2019).
- 356 7. M. S. Tift, P. J. Ponganis, Time domains of hypoxia adaptation—elephant seals stand out  
357 among divers. *Front. Physiol.* **10** (2019).
- 358 8. J. U. Meir, P. J. Ponganis, High-affinity hemoglobin and blood oxygen saturation in diving  
359 emperor penguins. *J. Exp. Biol.* **212**, 3330–3338 (2009).
- 360 9. W. K. Milsom, K. Johansen, R. M. T. Condon, 1973, Blood respiratory properties in some  
361 Antarctic birds. *JSTOR* **75**, 472 (1973).
- 362 10. B. Wienecke, G. Robertson, R. Kirkwood, K. Lawton, Extreme dives by free-ranging emperor  
363 penguins. *Polar Biol.* **30**, 133–142 (2007).
- 364 11. C. Lenfant, G. L. Kooyman, R. Elsner, C. M. Drabek, Respiratory function of blood of the  
365 Adélie penguin *Pygoscelis adeliae*. *Am. J. Physiol.* **216**, 1598–1600 (1969).
- 366 12. M. T. Grispo, *et al.*, Gene duplication and the evolution of hemoglobin isoform differentiation  
367 in birds. *J. Biol. Chem.* **287**, 37647–37658 (2012).
- 368 13. J. C. Opazo, *et al.*, Gene turnover in the avian globin gene families and evolutionary  
369 changes in hemoglobin isoform expression. *Mol. Biol. Evol.* **32**, 871–887 (2015).
- 370 14. J. Projecto-Garcia, *et al.*, Repeated elevational transitions in hemoglobin function during the  
371 evolution of Andean hummingbirds. *Proc. Natl. Acad. Sci. USA* **110**, 20669–20674 (2013).
- 372 15. Z. A. Cheviron, *et al.*, Integrating evolutionary and functional tests of adaptive hypotheses: a  
373 case study of altitudinal differentiation in hemoglobin function in an Andean sparrow,  
374 *Zonotrichia capensis*. *Mol. Biol. Evol.* **31**, 2948–2962 (2014).
- 375 16. S. C. Galen, *et al.*, Contribution of a mutational hot spot to hemoglobin adaptation in high-  
376 altitude Andean house wrens. *Proc. Natl. Acad. Sci. USA* **112**, 13958–13963 (2015).
- 377 17. C. Natarajan, *et al.*, Convergent evolution of hemoglobin function in high-altitude andean  
378 waterfowl involves limited parallelism at the molecular sequence level. *PLoS Genet* **11**,  
379 e1005681 (2015).
- 380 18. C. Natarajan, *et al.*, Predictable convergence in hemoglobin function has unpredictable  
381 molecular underpinnings. *Science* **354**, 336–339 (2016).
- 382 19. A. Kumar, *et al.*, Stability-mediated epistasis restricts accessible mutational pathways in the  
383 functional evolution of avian hemoglobin. *Mol. Biol. Evol.* **34**, 1240–1251 (2017).



- 384 20. A. Jendroszek, *et al.*, Allosteric mechanisms underlying the adaptive increase in  
385 hemoglobin–oxygen affinity of the bar-headed goose. *J. Exp. Biol.* **221**, jeb185470 (2018).
- 386 21. X. Zhu, *et al.*, Divergent and parallel routes of biochemical adaptation in high-altitude  
387 passerine birds from the Qinghai-Tibet Plateau. *Proc. Natl. Acad. Sci. USA.* **115**, 1865–1870  
388 (2018).
- 389 22. C. Natarajan, *et al.*, Molecular basis of hemoglobin adaptation in the high-flying bar-headed  
390 goose. *PLOS Genet.* **14**, e1007331 (2018).
- 391 23. E. H. Christensen, B. Dill, Oxygen dissociation curves of bird blood. *J. Biol. Chem.* **109**, 443–  
392 448 (1935).
- 393 24. F. H. Baumann, R. Baumann, A comparative study of the respiratory properties of bird blood.  
394 *Respir. Physiol.* **31**, 333–343 (1977).
- 395 25. P. Lutz, On the oxygen affinity of bird blood. *Am. Zool.* **1**, 187–198 (1980).
- 396 26. J. F. Storz, Hemoglobin-oxygen affinity in high-altitude vertebrates: is there evidence for an  
397 adaptive trend? *J. Exp. Biol.* **219**, 3190–3203 (2016).
- 398 27. J. F. Storz, G. R. Scott, Life Ascending: Mechanism and Process in Physiological Adaptation  
399 to High-Altitude Hypoxia. *An. Rev. Ecol. Evol. System.* **50**, 503–526 (2019).
- 400 28. K. B. Tate, *et al.*, Circulatory mechanisms underlying adaptive increases in thermogenic  
401 capacity in high-altitude deer mice. *J. Exp. Biol.* **220**, 3616–3620 (2017).
- 402 29. C. Lenfant, K. Johansen, J. D. Torrance, Gas transport and oxygen storage capacity in some  
403 pinnipeds and the sea otter. *Respir. Physiol.* **9**, 277–286 (1970).
- 404 30. A. V. Signore, *et al.*, Adaptive changes in hemoglobin function in high-altitude tibetan canids  
405 were derived via gene conversion and introgression. *Mol. Biol. Evol.* **36**, 2227–2237 (2019).
- 406 31. P. J. Butler, D. R. Jones, Physiology of diving of birds and mammals. *Phys. Rev.* **77**, 837–  
407 899 (1997).
- 408 32. P. J. Ponganis, Diving mammals. *Compr. Physiol.* **1**, 447–465 (2011).
- 409 33. G. Kooyman, J. Schroeder, D. Greene, V. Smith, Gas exchange in penguins during  
410 simulated dives to 30 and 68 m. *Am. J. Physiol.* **225**, 1467–1471 (1973).
- 411 34. P. J. Ponganis, *et al.*, Returning on empty: extreme blood O<sub>2</sub> depletion underlies dive  
412 capacity of emperor penguins. *J. Exp. Biol.* **210**, 4279–4285 (2007).
- 413 35. P. J. Ponganis, *et al.*, O<sub>2</sub> store management in diving emperor penguins. *J. Exp. Biol.* **212**,  
414 217–224 (2009).
- 415 36. H. Pan, *et al.*, High-coverage genomes to elucidate the evolution of penguins. *Gigascience*  
416 **8**, giz117 (2019).
- 417 37. R. C. Edgar, MUSCLE: multiple sequence alignment with high accuracy and high  
418 throughput. *Nucleic Acids Res.* **32**, 1792–1797 (2004).
- 419 38. L.-T. Nguyen, H. A. Schmidt, A. von Haeseler, B. Q. Minh, IQ-TREE: A fast and effective  
420 stochastic algorithm for estimating maximum-likelihood phylogenies. *Mol. Biol. Evol.* **32**,  
421 268–274 (2015).

- 422 39. S. Kalyaanamoorthy, B. Q. Minh, T. K. F. Wong, A. von Haeseler, L. S. Jermini,  
423 ModelFinder: fast model selection for accurate phylogenetic estimates. *Nat. Methods* **14**,  
424 587–589 (2017).
- 425 40. D. T. Hoang, O. Chernomor, A. von Haeseler, B. Q. Minh, L. S. Vinh, UFBoot2: Improving  
426 the ultrafast bootstrap approximation. *Mol. Biol. Evol.* **35**, 518–522 (2018).
- 427 41. Z. Yang, PAML 4: Phylogenetic analysis by maximum likelihood. *Mol. Biol. Evol.* **24**, 1586–  
428 1591 (2007).
- 429 42. J. Zhang, R. Nielsen, Z. Yang, Evaluation of an improved branch-site likelihood method for  
430 detecting positive selection at the molecular level. *Mol. Biol. Evol.* **22**, 2472–2479 (2005).
- 431 43. Z. Yang, W. S. W. Wong, and R. Nielsen, Bayes empirical Bayes inference of amino acid  
432 sites under positive selection. *Mol. Biol. Evol.* **22**, 1107–1118 (2005).
- 433 44. J. P. Bielawski, Z. Yang, A maximum likelihood method for detecting functional divergence at  
434 individual codon sites, with application to gene family evolution. *J. Mol. Evol.* **59**, 121–132  
435 (2004).
- 436 45. C. J. Weadick, B. S. W. Chang, An improved likelihood ratio test for detecting site-specific  
437 functional divergence among clades of protein-coding genes. *Mol. Biol. Evol.* **29**, 1297–1300  
438 (2012).
- 439 46. A. Waterhouse, *et al.*, SWISS-MODEL: homology modelling of protein structures and  
440 complexes. *Nucleic Acids Res.* **46**, W296–W303 (2018).
- 441 47. P. Benkert, M. Biasini, T. Schwede, Toward the estimation of the absolute quality of  
442 individual protein structure models. *Bioinformatics* **27**, 343–350 (2011).
- 443 48. E. Krissinel, K. Henrick, Inference of macromolecular assemblies from crystalline state. *J.*  
444 *Mol. Biol.* **372**, 774–797 (2007).
- 445 49. C. Natarajan, *et al.*, Expression and purification of recombinant hemoglobin in *Escherichia*  
446 *coli*. *PLoS ONE* **6**, e20176 (2011).
- 447 50. C. Natarajan, *et al.*, Epistasis among adaptive mutations in deer mouse hemoglobin.  
448 *Science* **340**, 1324–1327 (2013).
- 449 51. S. Claramunt, J. Cracraft, A new time tree reveals Earth history's imprint on the evolution of  
450 modern birds. *Sci. Adv.*, **1**, e1501005 (2015).

451  
452

453 **Figures and Tables**

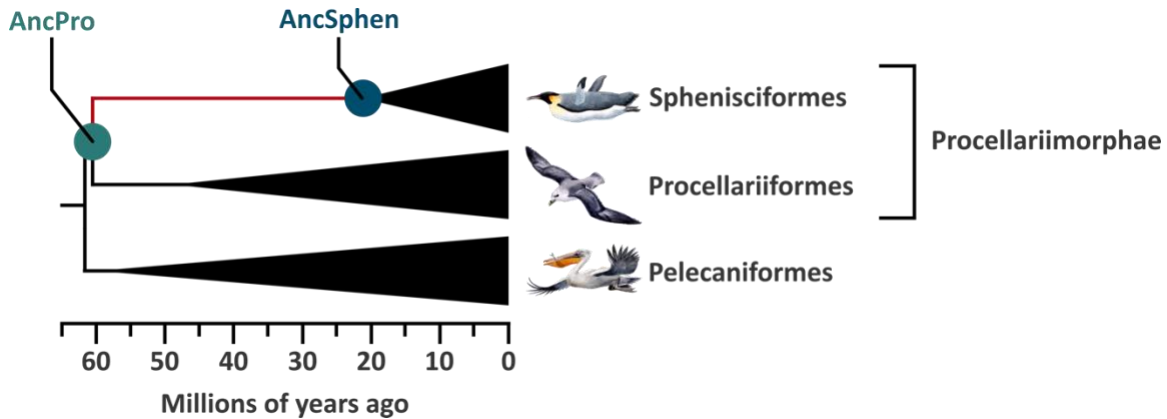

454  
455  
456  
457  
458  
459  
460  
461

**Figure 1.** Diagrammatic phylogeny showing the relationship between Sphenisciformes, Procellariiformes and Pelecaniformes. Ancestral hemoglobins were reconstructed for the two indicated nodes: the common ancestor of Sphenisciformes (AncSphen) and the common ancestor of Procellariimorphae (AncPro), the super order that contains Sphenisciformes and Procellariiformes. Divergence times are adapted from Claramunt and Cracraft (51).

462

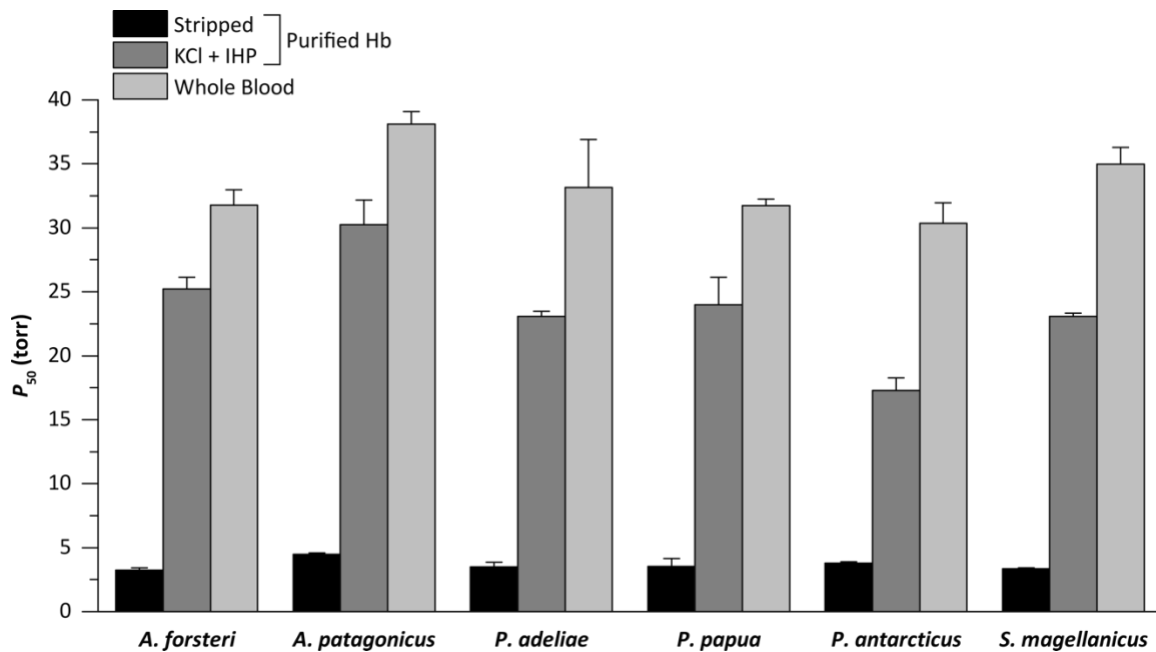

463

464

465 **Figure 2.** Oxygen tensions at half saturation ( $P_{50}$ ) for penguin whole-blood and purified  
466 hemoglobins at 37°C, in the absence (Stripped) and presence of 100 mM KCl and 0.2 mM  
467 inositol hexaphosphate (+KCl +IHP). The higher the  $P_{50}$ , the lower the Hb-O<sub>2</sub> affinity. Whole-  
468 blood  $P_{50}$  values are presented as mean±S.E (n=3). Purified Hb  $P_{50}$  values are derived from plots  
469 of log $P_{50}$  vs. pH, where a linear regression was fit to estimate  $P_{50}$  at exactly pH 7.40 (± S.E. of the  
470 regression estimate).  
471

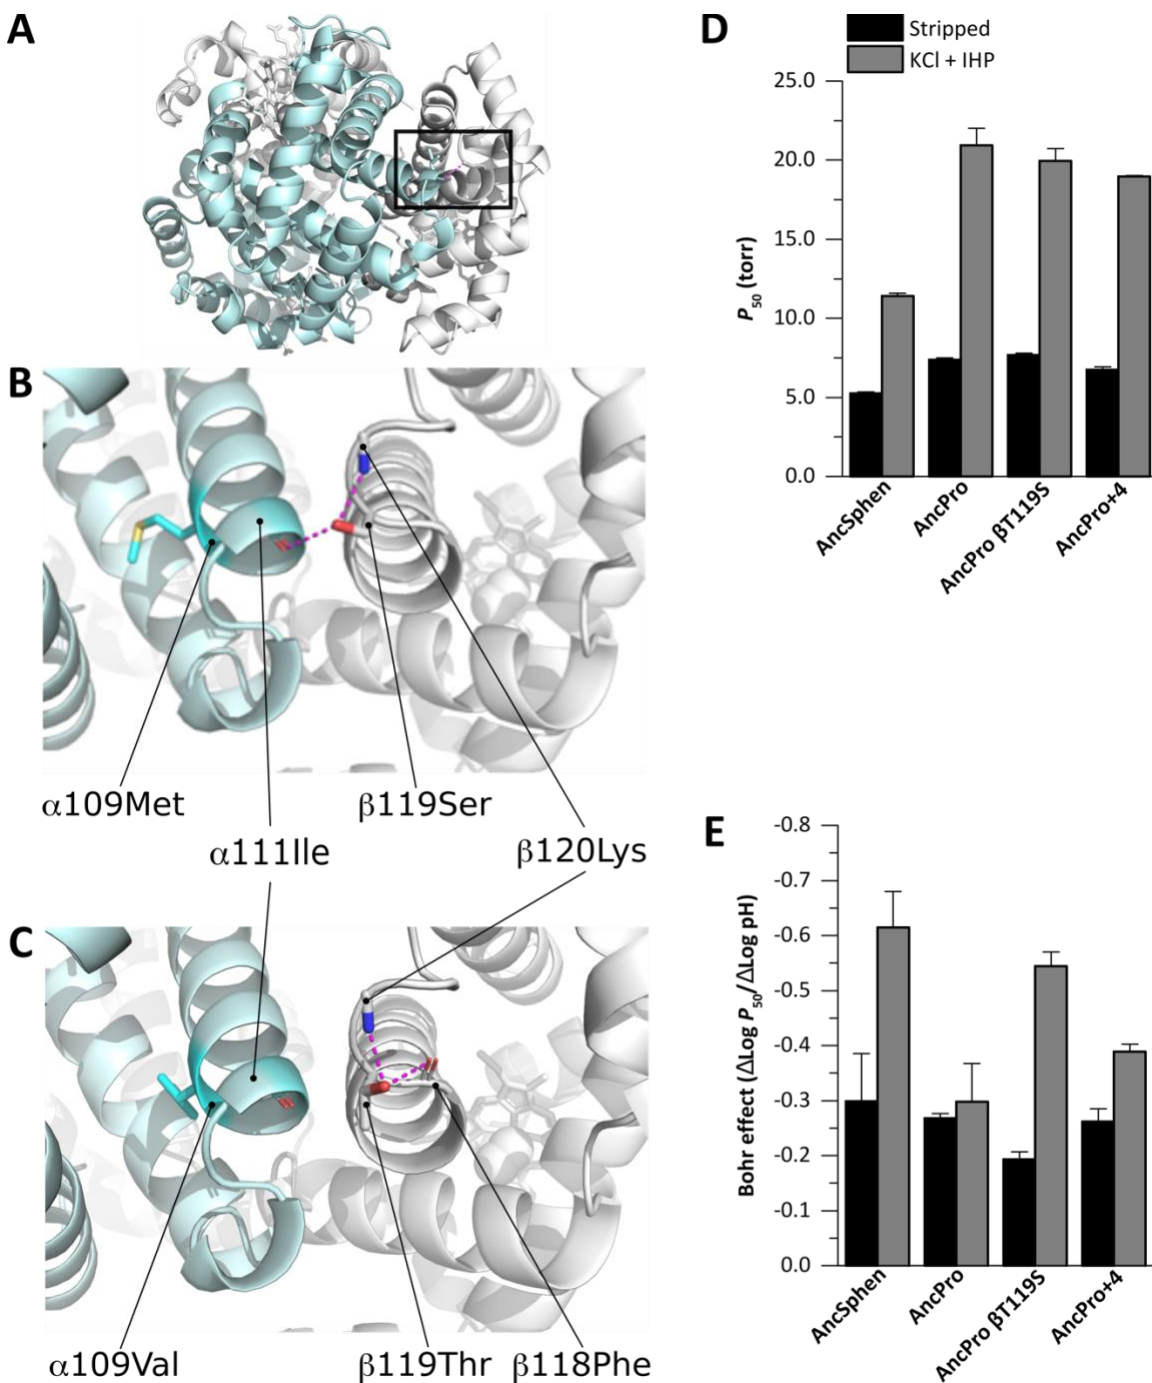

472  
473  
474  
475  
476  
477  
478  
479  
480  
481

**Figure 3.** Structural (A–C) and physiological effects (D, E) of amino acid substitutions in the reconstructed Hb proteins of the penguin ancestor (AncSphen) and the last common ancestor penguins shared with Procellariiformes (AncPro). A) Molecular model of the AncSphen Hb tetramer where the black box indicates the regions highlighted in panels B and C. B) Molecular model of AncSphen Hb showing inter-subunit stabilizing H-bonds (pink) between  $\beta 119\text{Ser}$  and both  $\alpha 111\text{Ile}$  and  $\beta 120\text{Lys}$ . C) Molecular model of AncPro Hb showing that replacement of  $\beta 119\text{Ser}$  with Thr removes the inter-subunit stabilizing H-bonds. D) Hb-O<sub>2</sub> affinity (as measured by  $P_{50}$ , the O<sub>2</sub> tension at half saturation) of AncSphen, AncPro, and two mutant rHbs with

482 penguin-specific amino acid replacements introduced on the AncPro background  
483 (AncPro $\beta$ 119Ser and AncPro+4). See text for explanation regarding the choice of candidate sites  
484 for mutagenesis experiments. Measurements were performed on Hb solutions (0.1 mM Hb in 0.1  
485 M HEPES/0.5 mM EDTA) at 37°C in the absence (stripped) and presence of 0.1 M KCl and 0.2  
486 mM inositol hexaphosphate (+KCl +IHP).  $P_{50}$  values are derived from plots of  $\log P_{50}$  vs. pH,  
487 where a linear regression was fit to estimate  $P_{50}$  at exactly pH 7.40 ( $\pm$  S.E. of the regression  
488 estimate). E) Bohr coefficients ( $\Delta\text{Log } P_{50}/\Delta\text{Log pH}$ ) were estimated from plots of  $\log P_{50}$  vs. pH,  
489 where the Bohr effect is represented by the slope of a linear regression ( $\pm$  S.E. of the slope  
490 estimate).
